# Supplementary material for: Species composition and forest structure explain the temperature sensitivity patterns of productivity in temperate forests
Source: Copernicus journal article supplement (doi:10.5194/bg-15-1795-2018), 2018-03-26
Supplement: Supplementary file 1 [file bg-15-1795-2018-supplement.zip]

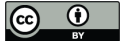

## *Supplement of*

# **Species composition and forest structure explain the temperature sensitivity patterns of productivity in temperate forests**

**Friedrich J. Bohn et al.**

*Correspondence to:* Friedrich J. Bohn ([friedrich.bohn@ufz.de](mailto:friedrich.bohn@ufz.de))

- [bg-15-1795-2018-supplement-title-page.pdf](#)
- [dataSet.Rdata](#)

The copyright of individual parts of the supplement might differ from the CC BY 4.0 License.
